# Supplementary material for: The effect of a motivational intervention on weight loss is moderated by level of baseline controlled motivation
Source: Springer Nature journal article supplement (doi:10.1186/1479-5868-7-4), 2010-01-01
Supplement: Additional file 2 [file 1479-5868-7-4-s2.pdf]

**Additional File 2: Hierarchical Regression Analysis**

| Step and Variable                                    | B     | SE B | 95% CI       | Beta   | R <sup>2</sup> |
|------------------------------------------------------|-------|------|--------------|--------|----------------|
| Standard Group coded -1 and Motivation Group coded 1 |       |      |              |        |                |
| Step 1                                               |       |      |              |        |                |
| Group                                                | 0.47  | 0.86 | -1.26, 2.19  | 0.06   |                |
| Baseline Controlled Motivation (z score)             | -2.00 | 0.86 | -3.72, -0.29 | -0.27* | .095*          |
| Step 2                                               |       |      |              |        |                |
| Group x Baseline Controlled Motivation (z score)     | 2.01  | 0.86 | 0.30, 3.73   | 0.27*  | 0.17*          |
| Standard Group coded 0 and Motivation Group coded 1  |       |      |              |        |                |
| Step 1                                               |       |      |              |        |                |
| Group                                                | 0.93  | 1.73 | -2.51, 4.38  | 0.06   |                |
| Baseline Controlled Motivation (z score)             | -4.02 | 1.17 | -6.35, -1.69 | -0.54* | 0.095*         |
| Step 2                                               |       |      |              |        |                |
| Group x Baseline Controlled Motivation (z score)     | 4.03  | 1.71 | 0.60, 7.45   | 0.37*  | 0.17*          |
| Motivation Group coded 0 and Standard Group coded 1  |       |      |              |        |                |
| Step 1                                               |       |      |              |        |                |
| Group                                                | -0.93 | 1.73 | -4.38, 2.51  | -0.06  |                |
| Baseline Controlled Motivation (z score)             | 0.01  | 1.26 | -2.50, 2.52  | -0.001 | 0.095          |
| Step 2                                               |       |      |              |        |                |
| Group x Baseline Controlled Motivation (z score)     | -4.03 | 1.71 | -7.45, -0.60 | -0.40* | 0.17*          |

CI= Confidence Interval; \* $p < 0.05$

This analysis confirms the moderating effect of baseline controlled motivation on weight loss.
